# Supplementary material for: A Sensitive Method for Detecting Zika Virus Antigen in Patients’ Whole-Blood Specimens as an Alternative Diagnostic Approach
Source: PubMed Central journal article supplement — J Infect Dis. 2017 Jun 6;216(2):182–90. doi: 10.1093/infdis/jix276 (PMC5853302; doi:10.1093/infdis/jix276), 2017-06-06
Supplement: jix276_suppl_supplementary_figure_1.pdf [file jix276_suppl_supplementary_figure_1.pdf]

**A**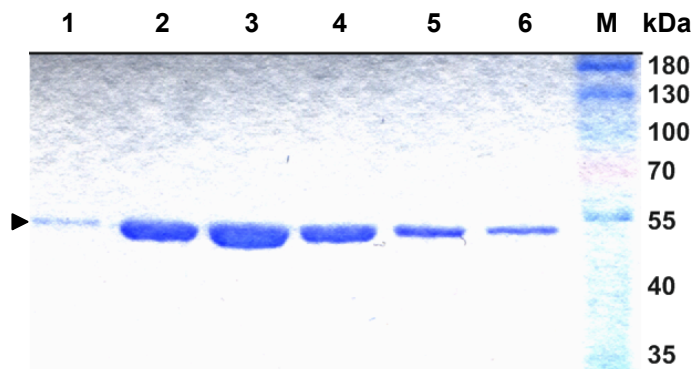**B**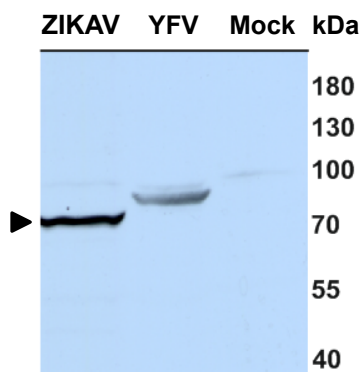**C**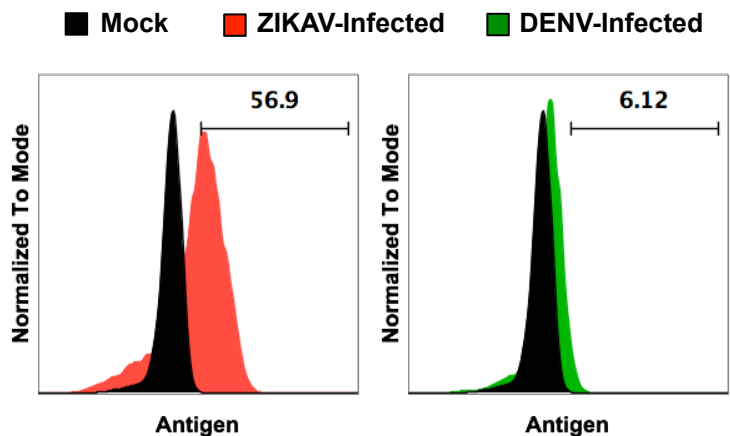

**Supplementary Figure 1. Production of anti-ZIKAV NS3 antibodies.** (A) Recombinant RNA helicase region of ZIKAV NS3 protein was expressed in *E.coli* cells and subsequently purified by Ni-affinity, ion exchange and size-exclusion chromatography. Protein fractions from lane 2, 3 and 4 were pooled and used for rabbit immunization to obtain ZIKAV NS3 specific antibodies. (B) Cell lysates obtained from Vero cells were infected with either ZIKAV or yellow fever virus (YF-17D) and subjected to a Western blot with the ZIKAV NS3 specific antibodies. Arrowhead indicates the protein of interest. (C) Vero cells were infected with either ZIKAV or DENV-1 isolate at a multiplicity of infection (moi) 1. Amount of NS3 antigen positive ZIKAV-infected or DENV-infected cells were determined at 96 hpi via intracellular staining with the ZIKAV-specific rabbit polyclonal antibody. Representative histograms from one experiment are illustrated.
