# Supplementary material for: A Sensitive Method for Detecting Zika Virus Antigen in Patients’ Whole-Blood Specimens as an Alternative Diagnostic Approach
Source: PubMed Central journal article supplement — J Infect Dis. 2017 Jun 6;216(2):182–90. doi: 10.1093/infdis/jix276 (PMC5853302; doi:10.1093/infdis/jix276), 2017-06-06
Supplement: jix276_suppl_supplementary_figure_2.pdf [file jix276_suppl_supplementary_figure_2.pdf]

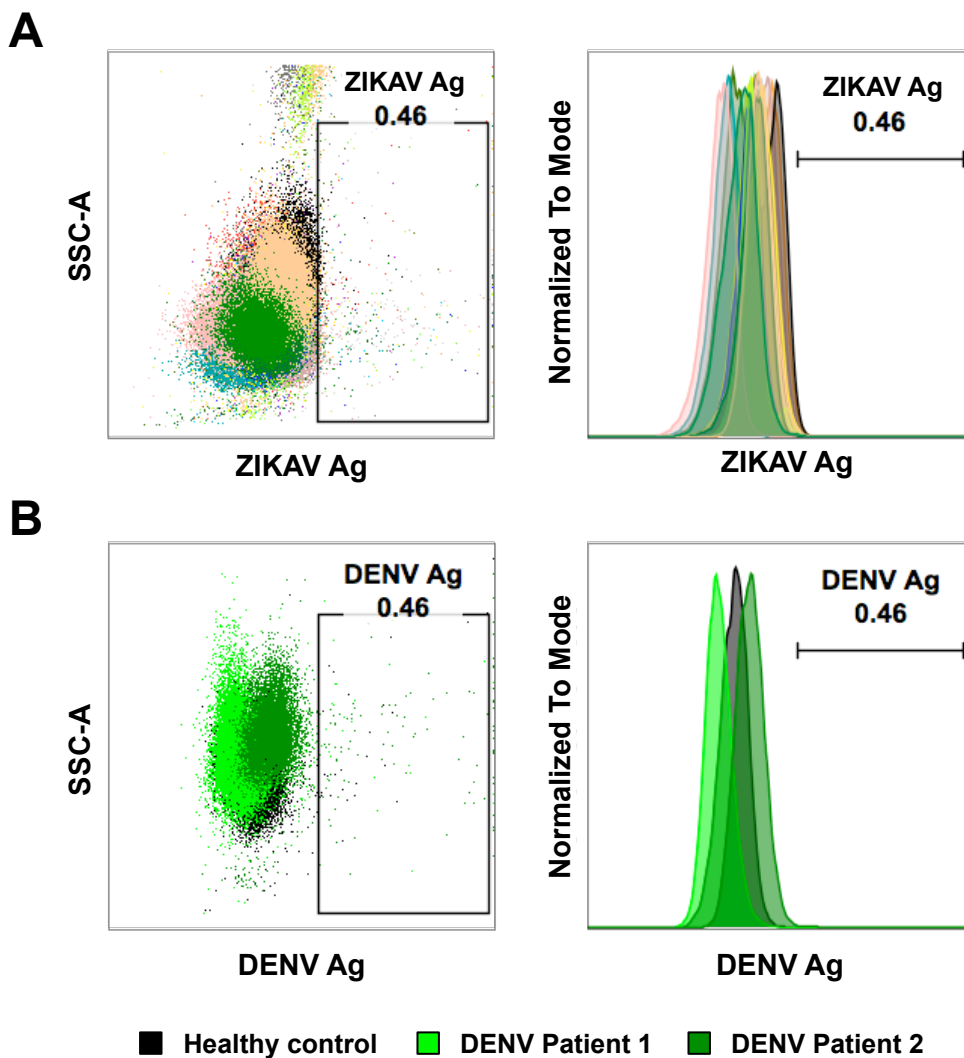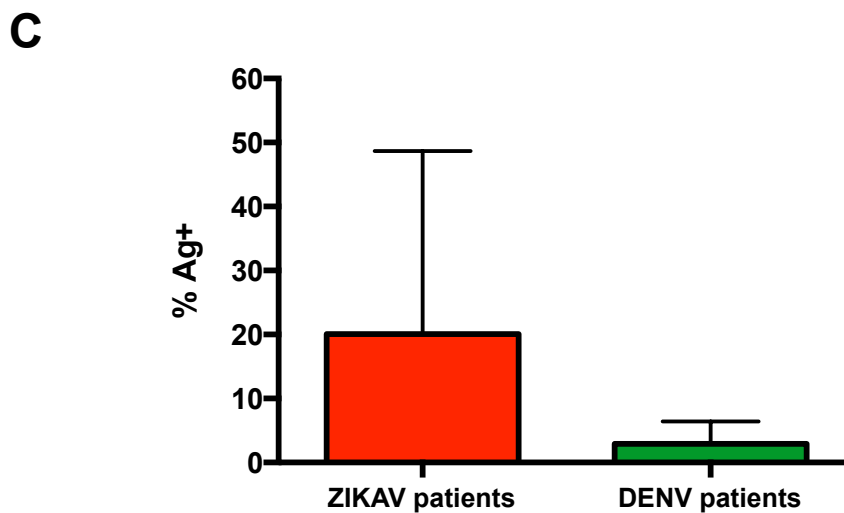

**Supplementary Figure 2. Defining the threshold of positive ZIKAV NS3 detection.** (A) Gating was performed on CD45<sup>+</sup> singlet cells and monocytes were identified as being CD14 positive. The threshold for positive ZIKAV NS3 detection was determined from a total of 20 healthy volunteers by staining with a ZIKAV-specific rabbit polyclonal antibody. (B) Percentage of DENV antigen detected in the blood monocytes of DENV-infected patients (n=2) recruited during the acute phase of the disease. (C) Compiled data showing the average percentages of antigen detected in ZIKAV-infected (n=39) and DENV-infected (n=2) patients during the acute phase. Data are presented as mean  $\pm$  standard error of the mean. Staining was performed with the ZIKAV-specific rabbit polyclonal antibody illustrated in (A).
